# Supplementary material
Source: Springer Nature journal article supplement (https://www.springermedizin.de/resource/supplementary/12879_2006_473_MOESM2_ESM.pdf/9449012)

**KDA**

**195,033**

**111,624**

**59,389**

**30,079**

**24,696**

**12,573**

**6,410**

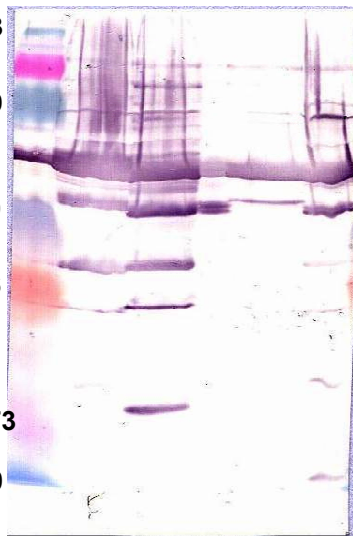

**1 2 3 4 5**

**A**

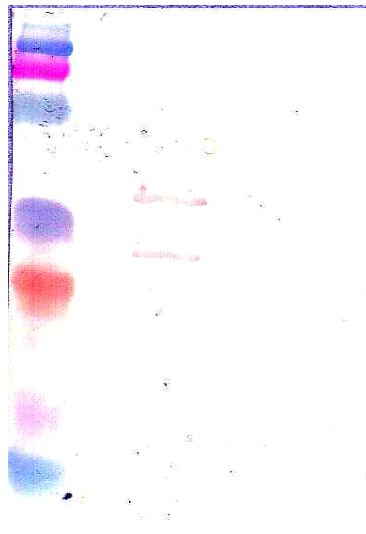

**1 2 3 4 5**

**B**

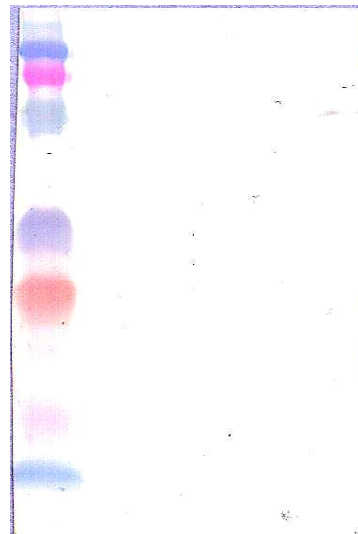

**1 2 3 4 5**

**C**

Supplement: MOESM2 [file 9449012]
